# Supplementary material for: Synthesis of size-tuneable β-FeOOH nanoellipsoids and a study of their morphological and compositional changes by reduction
Source: Royal Society of Chemistry journal article supplement (doi:10.1039/c8ce01778f), 2019-01-01
Supplement: c8ce01778f1.pdf [file c8ce01778f1.pdf]

*Electronic supplementary information*

# Synthesis of Size-Tuneable $\beta$ -FeOOH Nanoellipsoids and Study of Their Morphological and Compositional Changes by Reduction

Georgios Kasparis<sup>a,b</sup>, Aritz Sterne Erdocio<sup>a,b</sup>, Joshua Mark Tuffnell<sup>b</sup> and Nguyen Thi Kim Thanh<sup>a,b\*</sup>

<sup>a</sup> Biophysics group, Department of Physics and Astronomy, University College London, Gower Street, London WC1E 6BT, United Kingdom

<sup>b</sup> UCL Healthcare Biomagnetic and Nanomaterials Laboratories, 21 Albemarle Street, London W1S 4BS, United Kingdom

\*Corresponding author

E-mail: ntk.thanh@ucl.ac.uk; Fax: +44 (0)207 670 2920; Tel: +44 (0)207 491 6509

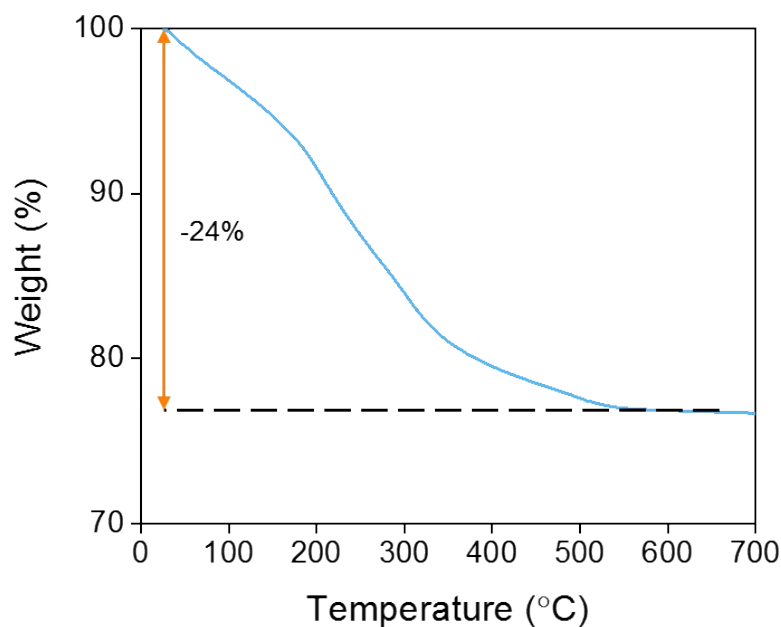

**Figure S1.** Thermogravimetric analysis of PEI coated  $\beta$ -FeOOH nanoparticles

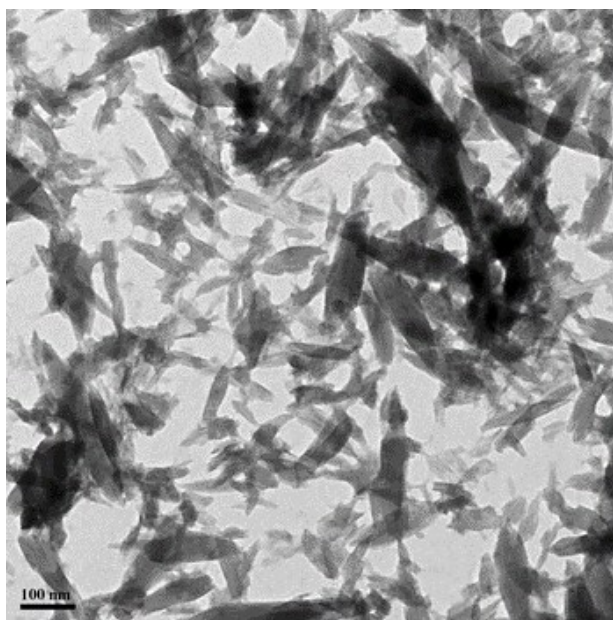

**Figure S2.** Synthesis of  $\beta$ -FeOOH in the absence of PEI at 80 °C for 2 h.

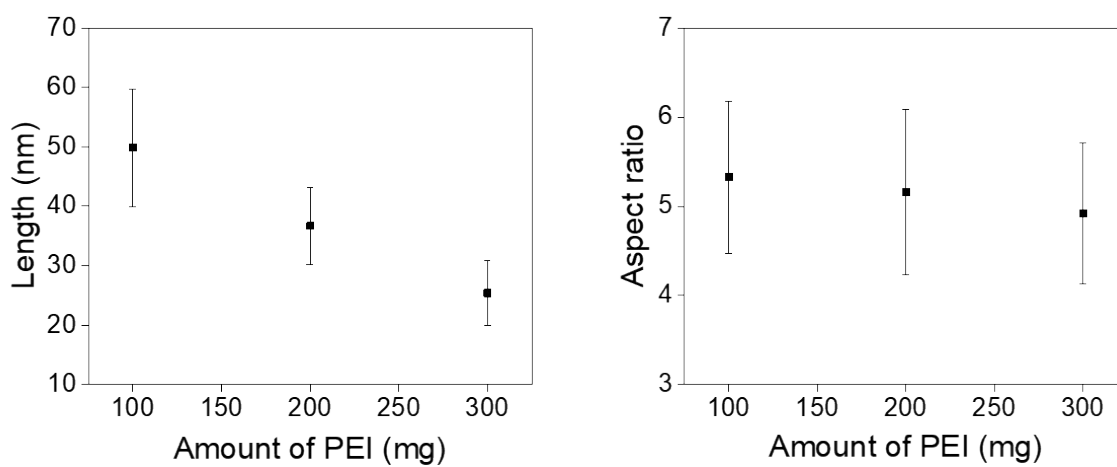

**Figure S3.** Length (left) and aspect ratio (right) changes of  $\beta$ -FeOOH nanoellipsoids with different amount of 750 kDa PEI.

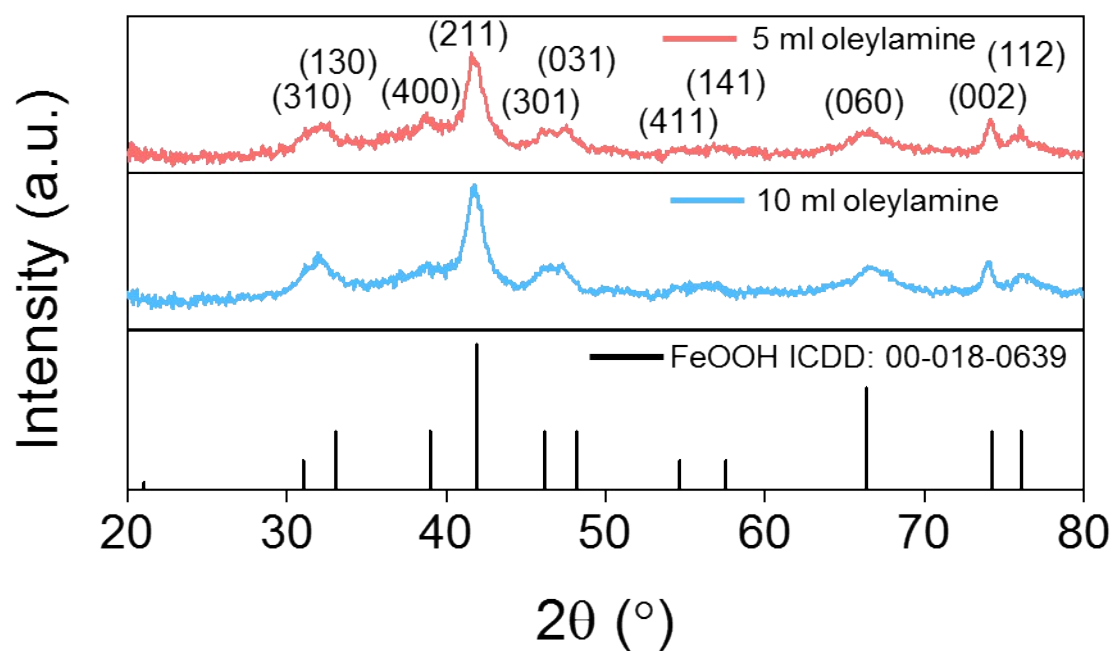

**Figure S4.** XRD patterns of oleylamine reduced  $\beta$ -FeOOH nanoellipsoids.

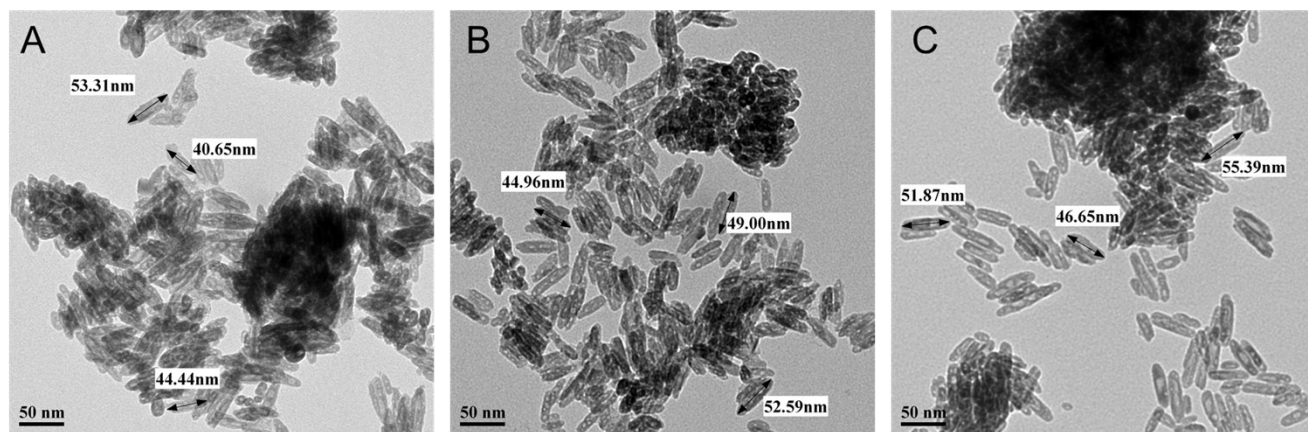

**Figure S5.** TEM images of  $\beta$ -FeOOH nanoellipsoids reduced by A) 5 ml, B) 10 ml and C) 15 ml oleylamine. Numbers are indicative of the lengths of the nanorods in each region in the TEM image at each condition.

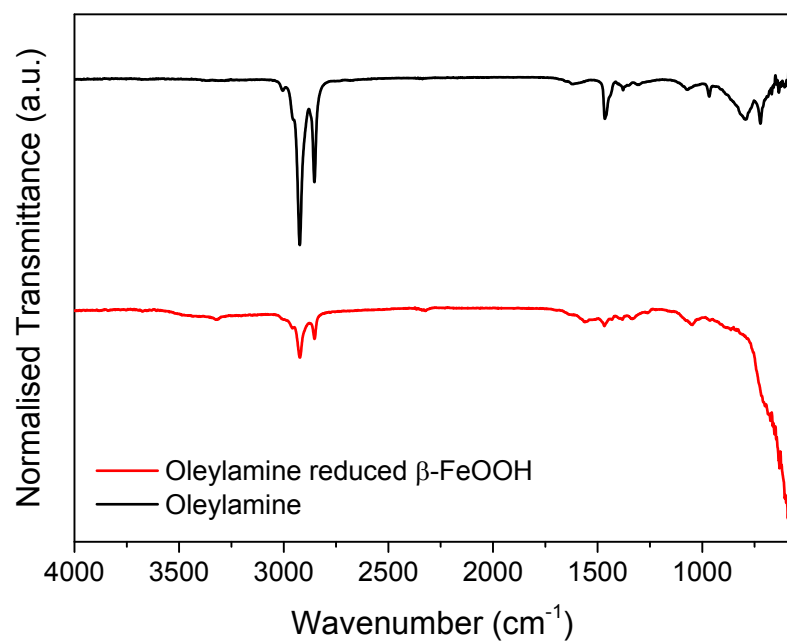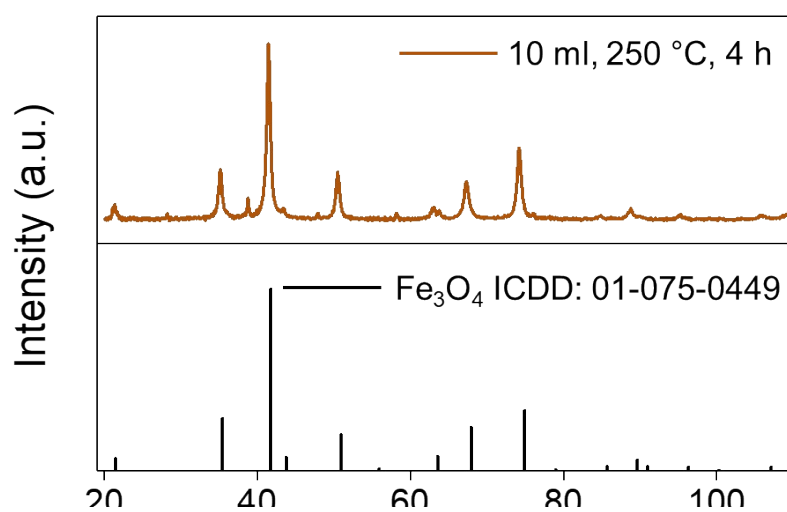

**Figure S6.** ATR-FTIR spectra of oleylamine and oleylamine reduced nanoparticles.

**Figure S7.** XRD pattern of  $\beta\text{-FeOOH}$  nanoellipsoids reduced with oleylamine at 250 °C for 4 h.

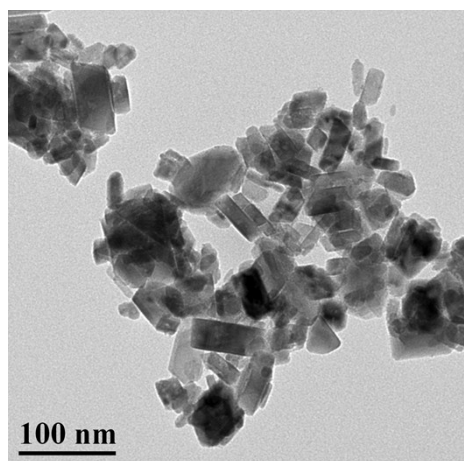

**Figure S8.** TEM image of nanoparticles reduced with oleylamine at 250 °C for 4 h.

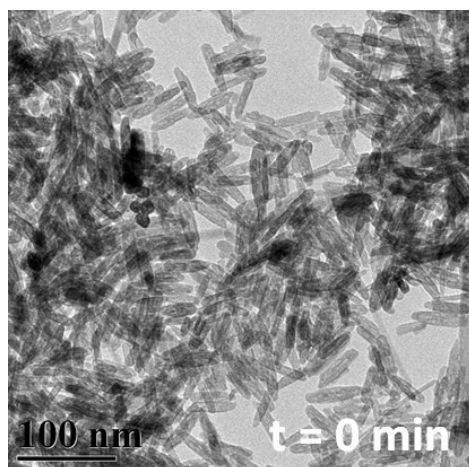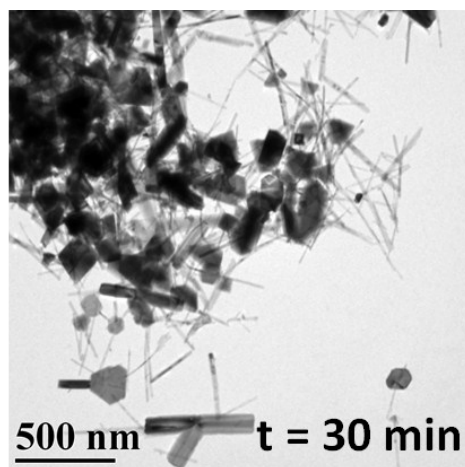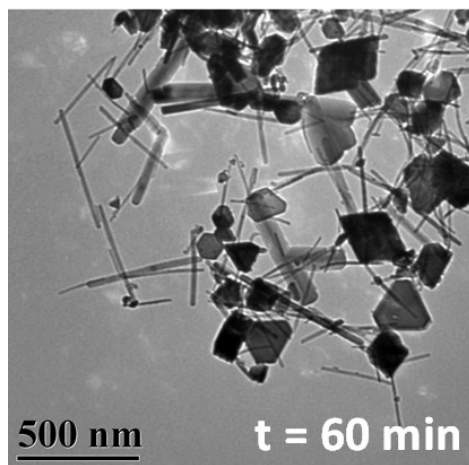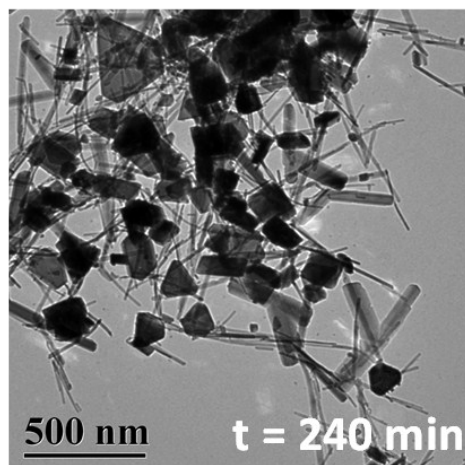

**Figure S9.** TEM images of hydrazine reduction at different reaction times.
